# Supplementary material for: Novel microalgae strains from selected lower Himalayan aquatic habitats as potential sources of green products
Source: PLOS journal article supplement (doi:10.1371/journal.pone.0267788), 2022-05-10
Supplement: S4 (10.1371/journal.pone.0267788.s004) [file journal.pone.0267788.s004]

**S4 Fig.** Correlation of chlorophyll a and carotenoids (A), chlorophyll a and pigments content (B), carotenoids and pigments content (C) and chlorophyll b and pigments content (D) for the selected microalgae strains under mesophilic cultivation conditions (step 2 of the study).
