# Supplementary figures and images for: Novel microalgae strains from selected lower Himalayan aquatic habitats as potential sources of green products
Source: PLOS journal article supplement (doi:10.1371/journal.pone.0267788), 2022-05-10

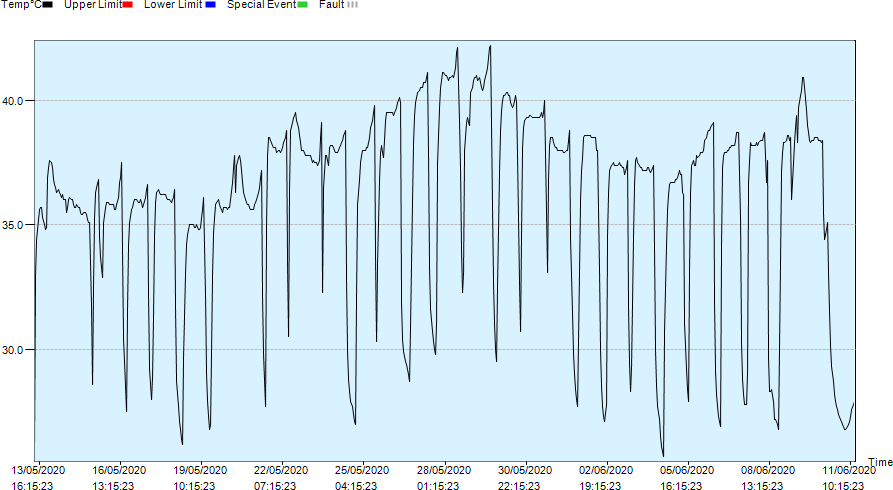


**S2 Fig.** Cultivation temperature variations in step 2 of the study.

Supplement: S2 (10.1371/journal.pone.0267788.s002) [file journal.pone.0267788.s002]
